# Supplementary material for: Auxin patternsSolanum lycopersicumleaf morphogenesis
Source: Oxford University Press journal article supplement (doi:10.1242/dev.033811), 2009-08-07
Supplement: dev033811tabless1-s3.pdf [file dev033811tabless1-s3.pdf]

**Table S1. Phenotypic results from NPA treatment of developing tomato leaves**

| Stage | Treatment | No leaflets | At least one pair of leaflets | Total |
|-------|-----------|-------------|-------------------------------|-------|
| P2*   | Control   | 0           | 24                            | 24    |
| P2*   | NPA       | 5           | 20                            | 25    |
| P1*   | Control   | 0           | 24                            | 24    |
| P1*   | NPA       | 10          | 12                            | 22    |

**Table S2. Phenotypic results from the application of auxin to the entire length of developing leaves**

| Treatment | Ectopic blade | Total |
|-----------|---------------|-------|
| DMSO      | 0             | 14    |
| 1 mM IAA  | 5             | 14    |
| 10 mM IAA | 13            | 14    |

**Table S3. Phenotypic results from the application of auxin as a spot to developing leaves**

| Treatment | Ectopic leaflet | Ectopic blade | Broadened leaflet | No reaction | Total |
|-----------|-----------------|---------------|-------------------|-------------|-------|
| DMSO      | 0               | 0             | 0                 | 0           | 41    |
| 1 mM IAA  | 1               | 1             | 4                 | 36          | 42    |
| 10 mM IAA | 7               | 9             | 8                 | 15          | 39    |
